# Supplementary material for: Leukoaraiosis as a Predictor of Depression and Cognitive Impairment among Stroke Survivors: A Systematic Review
Source: MDPI journal article supplement (doi:10.3390/neurolint15010016), 2023-02-13
Supplement: s1 [file s1]

*Systematic Review*

# Leukoaraiosis as a Predictor of Depression and Cognitive Impairment among Stroke Survivors: A Systematic Review

Eftychia Tziaka <sup>1,†</sup>, Foteini Christidi <sup>1,†</sup>, Dimitrios Tsiptsios <sup>1,\*</sup>, Anastasia Sousanidou <sup>1</sup>, Stella Karatzetzou <sup>1</sup>, Anna Tsiakiri <sup>1</sup>, Triantafyllos K. Doskas <sup>1</sup>, Konstantinos Tsamakis <sup>2</sup>, Nikolaos Retzepis <sup>3</sup>, Christos Konstantinidis <sup>3</sup>, Christos Kokkotis <sup>3</sup>, Aspasia Serdari <sup>4</sup>, Nikolaos Aggelousis <sup>3</sup> and Konstantinos Vadikolias <sup>1</sup>

<sup>1</sup> Neurology Department, Democritus University of Thrace, 68100 Alexandroupolis, Greece

<sup>2</sup> Institute of Psychiatry, Psychology and Neuroscience (IoPPN), King's College London, London SE5 8AB, UK

<sup>3</sup> Department of Physical Education and Sport Science, Democritus University of Thrace, 69100 Komotini, Greece

<sup>4</sup> Department of Child and Adolescent Psychiatry, Medical School, Democritus University of Thrace, 68100 Alexandroupolis, Greece

\* Correspondence: tsiptsios.dimitrios@yahoo.gr; Tel.: +30-6944320016

† These authors contributed equally to this work.

**Citation:** Tziaka, E.; Christidi, F.; Tsiptsios, D.; Sousanidou, A.; Karatzetzou, S.; Tsiakiri, A.; Doskas, T.K.; Tsamakis, K.; Retzepis, N.; Konstantinidis, C.; et al. Leukoaraiosis as a Predictor of Depression and Cognitive Impairment among Stroke Survivors: A Systematic Review. *Neurol. Int.* **2023**, *15*, 238–272. <https://doi.org/10.3390/neurolint15010016>

Academic Editor: Tibor Hortobágyi

Received: 29 December 2022

Revised: 2 February 2023

Accepted: 6 February 2023

Published: 13 February 2023

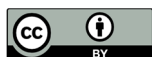

**Copyright:** © 2023 by the authors. Licensee MDPI, Basel, Switzerland. This article is an open access article distributed under the terms and conditions of the Creative Commons Attribution (CC BY) license (<https://creativecommons.org/licenses/by/4.0/>).

**Supplementary Table 1.** Characteristics of the included studies focusing on depression.

|   | <b>1<sup>st</sup> Author<br/>(Year)</b> | <b>Cerebrovascular<br/>Risk Factors (n) / Previous stroke</b>                                                                                                                                                                                                                              | <b>mNOS (0-8)<br/>[Selection (3); Comparability (2);<br/>Outcome (3)]</b> |
|---|-----------------------------------------|--------------------------------------------------------------------------------------------------------------------------------------------------------------------------------------------------------------------------------------------------------------------------------------------|---------------------------------------------------------------------------|
| 1 | Guo<br>(2022)<br>[55]                   | <ul style="list-style-type: none"> <li>Hypertension n=246, Diabetes mellitus n=135, Smoking n=135</li> <li>Previous stroke n=0</li> </ul>                                                                                                                                                  | Selection (3)<br>Comparability (2)<br>Outcome (2)<br><br>Total = 7        |
| 2 | Jaroonpip<br>atkul<br>(2022)<br>[54]    | <ul style="list-style-type: none"> <li>Smoking n=3, Hypertension n=11, Dyslipidemia n=12, Diabetes mellitus n=16, Ischemic heart disease n=6, Atrial fibrillation n=4</li> <li>Previous stroke n=9</li> </ul>                                                                              | Selection (3)<br>Comparability (2)<br>Outcome (3)<br><br>Total = 8        |
| 3 | Zhou<br>(2022)<br>[56]                  | <ul style="list-style-type: none"> <li>Hypertension n=241, Diabetes mellitus n=80, Hyperlipidemia n=41, Atrial fibrillation n=33, Coronary heart disease n=6, Smoking n=90, Alcohol n=62</li> <li>Previous stroke n=44</li> </ul>                                                          | Selection (3)<br>Comparability (2)<br>Outcome (2)<br><br>Total = 7        |
| 4 | Douven<br>(2020)<br>[44]                | <ul style="list-style-type: none"> <li>n/a</li> <li>n/a</li> </ul>                                                                                                                                                                                                                         | Selection (3)<br>Comparability (2)<br>Outcome (3)<br><br>Total = 8        |
| 5 | Bae (2019)<br>[51]                      | <ul style="list-style-type: none"> <li>Hypertension n=204, Diabetes mellitus n=112, Heart disease n=33, Hypercholesterolemia n=229</li> <li>Previous stroke n=34</li> </ul>                                                                                                                | Selection (3)<br>Comparability (2)<br>Outcome (3)<br><br>Total = 8        |
| 6 | Carnes-<br>Vendrell<br>(2019)<br>[58]   | <ul style="list-style-type: none"> <li>Alcohol n=38, Smoking n=23, Diabetes mellitus n=30, Hypertension n=56, Hypercholesterolemia n=37, Atrial fibrillation n=5</li> <li>Previous stroke n=14</li> </ul>                                                                                  | Selection (2)<br>Comparability (2)<br>Outcome (3)<br><br>Total = 7        |
| 7 | Pavlovic<br>(2016)<br>[59]              | <ul style="list-style-type: none"> <li>Hypertension n=264, Diabetes mellitus n=76, Hypercholesterolemia n=245, Smoking n=99, Coronary artery disease n=46, Peripheral artery disease n=19, atrial fibrillation n=13, Carotid stenosis &gt;50% n=20</li> <li>Previous stroke n/a</li> </ul> | Selection (3)<br>Comparability (2)<br>Outcome (3)<br><br>Total = 8        |
| 8 | Tanislav<br>(2015)<br>[46]              | <ul style="list-style-type: none"> <li>Hypertension n=961, Diabetes mellitus n=195, Hyperlipidemia n=637, Obesity n=459, Tobacco smoking n=1103, Cardiovascular disease n=165, Physical inactivity n=924, Obstructive sleep apnea n=72, Sleep ≤6 h at night</li> </ul>                     | Selection (2)<br>Comparability (1)<br>Outcome (2)<br><br>Total = 5        |

time n=367, Regular alcohol consumption n=1017, Higher alcohol consumption n=650

- Previous stroke n=0

Notes. n/a = not available; n = number; mNOS = modified Newcastle-Ottawa Scale.

**Supplementary Table 2.** Characteristics of included studies focusing on cognition.

| 1 <sup>st</sup> Author<br>(Year) | Cerebrovascular<br>Risk Factors (n) / Previous stroke                                                                                                                                                                                                                            | mNOS (0-8)<br>[Selection (3); Comparability (2); Outcome (3)]      |
|----------------------------------|----------------------------------------------------------------------------------------------------------------------------------------------------------------------------------------------------------------------------------------------------------------------------------|--------------------------------------------------------------------|
| 1. Georgakis<br>(2022) [68]      | <ul style="list-style-type: none"> <li>• Hypertension n=515, Diabetes mellitus n=131, Smoking n=155, Alcohol n=498, Atrial fibrillation n=133</li> <li>• Previous stroke n=71</li> </ul>                                                                                         | Selection (3)<br>Comparability (2)<br>Outcome (3)<br><br>Total = 8 |
| 2. Fruhwirth<br>(2021)<br>[100]  | <ul style="list-style-type: none"> <li>• Hyperlipidemia n=65, Hypertension n=61, Active smoking n=32, Diabetes mellitus n=12, Obesity n=10</li> <li>• Previous stroke n/a</li> </ul>                                                                                             | Selection (3)<br>Comparability (2)<br>Outcome (3)<br><br>Total = 8 |
| 3. Pasi (2021)<br>[98]           | <ul style="list-style-type: none"> <li>• Smoking n=66, Alcohol n=321, Hypertension n=458, Diabetes n=121, coronary artery disease n=101, Atrial fibrillation n=99</li> <li>• Previous stroke n=75</li> </ul>                                                                     | Selection (3)<br>Comparability (2)<br>Outcome (3)<br><br>Total = 8 |
| 4. Peng<br>(2021)<br>[79]        | <ul style="list-style-type: none"> <li>• Hypertension n=112, Smoking n=34, Diabetes mellitus n=48, Coronary heart disease n=32, Atrial fibrillation n=31</li> <li>• Previous stroke n/a</li> </ul>                                                                               | Selection (2)<br>Comparability (1)<br>Outcome (2)<br><br>Total = 5 |
| 5. Sung<br>(2021)<br>[85]        | <ul style="list-style-type: none"> <li>• Hypertension n=90, Diabetes mellitus n=40, Hyperlipidemia n=88, Atrial fibrillation n=9</li> <li>• Previous stroke n=0</li> </ul>                                                                                                       | Selection (3)<br>Comparability (2)<br>Outcome (3)<br><br>Total = 8 |
| 6. Appleton<br>(2020)<br>[67]    | <ul style="list-style-type: none"> <li>• Hypertension n=2607, Diabetes mellitus n=699, Atrial fibrillation n=762, Ischemic heart disease n=669, Peripheral artery disease n=117, Hyperlipidemia n=1098, Smoking n=945, Alcohol n=294</li> <li>• Previous stroke: 1138</li> </ul> | Selection (2)<br>Comparability (1)<br>Outcome (3)<br><br>Total = 6 |
| 7. Suda<br>(2020)<br>[80]        | <ul style="list-style-type: none"> <li>• Smoking n=40, Alcohol n=63, Hypertension n=78, Diabetes mellitus n=34, Dyslipidemia n=50, Ischemic heart disease n=7, Atrial fibrillation n=10</li> <li>• Previous stroke n=17</li> </ul>                                               | Selection (3)<br>Comparability (2)<br>Outcome (2)<br><br>Total = 7 |
| 8. Yatawara<br>(2020)<br>[87] *  | <ul style="list-style-type: none"> <li>• n/a</li> <li>• n/a</li> </ul>                                                                                                                                                                                                           | Selection (3)<br>Comparability (2)<br>Outcome (2)<br><br>Total = 7 |

|     |                        |                                                                                                                                                                                                                                            |                                                                    |
|-----|------------------------|--------------------------------------------------------------------------------------------------------------------------------------------------------------------------------------------------------------------------------------------|--------------------------------------------------------------------|
| 9.  | Du (2019) [69]         | <ul style="list-style-type: none"> <li>Hypercholesterolemia n=13, Diabetes mellitus n=49, Hypertension n=90, Smoking n=57</li> <li>Previous stroke n/a</li> </ul>                                                                          | Selection (3)<br>Comparability (2)<br>Outcome (1)<br><br>Total = 6 |
| 10. | Molad (2019) [84]      | <ul style="list-style-type: none"> <li>Smoking n=89, Diabetes mellitus n=109, Dyslipidemia n=211, Hypertension n=232</li> <li>Previous stroke n=0</li> </ul>                                                                               | Selection (2)<br>Comparability (2)<br>Outcome (3)<br><br>Total = 7 |
| 11. | Liang (2019) [78]      | <ul style="list-style-type: none"> <li>Current or previous smoking n=157, Hypertension n=292, Hyperlipidemia n=184, Diabetes mellitus n=114, Ischemic heart disease n=19, Atrial fibrillation n=17</li> <li>Previous stroke n=0</li> </ul> | Selection (3)<br>Comparability (2)<br>Outcome (3)<br><br>Total = 7 |
| 12. | Zamboni (2019) [89]    | <ul style="list-style-type: none"> <li>Hypertension n=260, Diabetes mellitus n=55, Atrial fibrillation n=60, Hyperlipidemia n=163, Smoking n=159</li> <li>n/a</li> </ul>                                                                   | Selection (2)<br>Comparability (2)<br>Outcome (2)<br><br>Total = 6 |
| 13. | Hawe (2018) [65]       | <ul style="list-style-type: none"> <li>n/a</li> <li>Previous stroke n=0</li> </ul>                                                                                                                                                         | Selection (2)<br>Comparability (1)<br>Outcome (3)<br><br>Total = 6 |
| 14. | Puy (2018) [66]        | <ul style="list-style-type: none"> <li>Hypertension n=206, Diabetes mellitus n=70, Hypercholesterolemia n=152, Smoking n=81, Alcohol n=15</li> <li>Previous stroke n=26</li> </ul>                                                         | Selection (3)<br>Comparability (2)<br>Outcome (3)<br><br>Total = 8 |
| 15. | Yatawara (2018) [86] * | <ul style="list-style-type: none"> <li>n/a</li> <li>n/a</li> </ul>                                                                                                                                                                         | Selection (3)<br>Comparability (2)<br>Outcome (3)<br><br>Total = 8 |
| 16. | Divya (2017) [94]      | <ul style="list-style-type: none"> <li>Diabetes mellitus n=28, Hypertension n=44, Dyslipidemia n=24, Smoking n=18</li> <li>Previous stroke n/a</li> </ul>                                                                                  | Selection (2)<br>Comparability (2)<br>Outcome (3)<br><br>Total = 7 |
| 17. | Cao (2017) [77]        | <ul style="list-style-type: none"> <li>Hypertension n=44, Diabetes mellitus n=14, Hypercholesterolemia n=9, Smoking n=15</li> <li>Previous stroke n/a</li> </ul>                                                                           | Selection (2)<br>Comparability (2)<br>Outcome (2)<br><br>Total = 6 |
| 18. | Molad (2017) [95]      | <ul style="list-style-type: none"> <li>Hypertension n=149, Diabetes mellitus n=64, Dyslipidemia n=138, Ischemic heart disease n=30, Smoking n=57</li> <li>Previous stroke n=0</li> </ul>                                                   | Selection (2)<br>Comparability (2)<br>Outcome (3)<br><br>Total = 7 |

|     |                                 |                                                                                                                                                                                                                                                                                                                                                                              |                                                                    |
|-----|---------------------------------|------------------------------------------------------------------------------------------------------------------------------------------------------------------------------------------------------------------------------------------------------------------------------------------------------------------------------------------------------------------------------|--------------------------------------------------------------------|
| 19. | Sivakumar<br>(2017)<br>[93]     | <ul style="list-style-type: none"> <li>Hypertension n=69, Diabetes mellitus n=21, Dyslipidemia n=57</li> <li>Previous stroke n=29</li> </ul>                                                                                                                                                                                                                                 | Selection (2)<br>Comparability (2)<br>Outcome (3)<br><br>Total = 7 |
| 20. | Zhang<br>(2017)<br>[81]         | <ul style="list-style-type: none"> <li>Hypertension n=156, Diabetes n=111, Dyslipidemia n=53, Coronary artery disease n=13, Smoking n=90</li> <li>Previous stroke n=0</li> </ul>                                                                                                                                                                                             | Selection (3)<br>Comparability (1)<br>Outcome (2)<br><br>Total = 6 |
| 21. | Mandzia<br>(2016)<br>[92]       | <ul style="list-style-type: none"> <li>Hypertension n=79, Diabetes mellitus n=16, Previous myocardial infarction n=11, Smoking n=13, Atrial fibrillation n=8, Obstructive sleep apnea n=67</li> <li>Previous stroke n/a</li> </ul>                                                                                                                                           | Selection (3)<br>Comparability (2)<br>Outcome (3)<br><br>Total = 8 |
| 22. | Moulin<br>(2016)<br>[97] **     | <ul style="list-style-type: none"> <li>Ischemic heart attack n=21, alcohol 65, Hypertension n=141, Diabetes n=31, Hypercholesterolemia n=69, Smoking n=42</li> <li>Previous stroke n=33</li> </ul>                                                                                                                                                                           | Selection (3)<br>Comparability (2)<br>Outcome (3)<br><br>Total = 8 |
| 23. | Benedictus<br>(2015)<br>[97] ** | <ul style="list-style-type: none"> <li>Hypertension n=105, Diabetes mellitus n=23, Hypercholesterolemia n= 51, Smoking n=32, alcohol n=54, atrial fibrillation n=18</li> <li>Previous stroke n=25</li> </ul>                                                                                                                                                                 | Selection (3)<br>Comparability (2)<br>Outcome (3)<br><br>Total = 8 |
| 24. | Kumral<br>(2015)<br>[62]        | <ul style="list-style-type: none"> <li>Hypertension n=7388, Current cigarette smoker n=1678, Diabetes mellitus n=2810, Coronary heart disease n=2015, Atrial fibrillation n=1645, Hyperhomocysteinemia n=1175, Hypercholesterolemia n=3481, Hypertriglyceridemia n=2240, Higher LDL cholesterol n=4339, Lower HDL cholesterol n=5755</li> <li>Previous stroke n/a</li> </ul> | Selection (2)<br>Comparability (1)<br>Outcome (3)<br><br>Total = 6 |
| 25. | Nakano<br>(2015)<br>[71]        | <ul style="list-style-type: none"> <li>Hypertension n=91, Dyslipidemia n=66, Diabetes n=5, Atrial fibrillation n=18, Ischemic heart disease n=12</li> <li>Previous stroke n/a</li> </ul>                                                                                                                                                                                     | Selection (2)<br>Comparability (2)<br>Outcome (3)<br><br>Total = 7 |

Notes. Studies from the same group or cohort are highlighted with \* and \*\*. n/a = not available; n = number; mNOS = modified Newcastle-Ottawa Scale.

**Supplementary Table 3.** Characteristics of included studies focusing on depression and cognition.

| 1 <sup>st</sup><br>Author<br>(Year) | Cerebrovascular<br>Risk Factors (n) / Previous stroke                  | mNOS (0-8)                                      |  |
|-------------------------------------|------------------------------------------------------------------------|-------------------------------------------------|--|
|                                     |                                                                        | [Selection (3); Comparability (2); Outcome (3)] |  |
| 1. Douven<br>(2018)<br>[42]         | <ul style="list-style-type: none"> <li>• n/a</li> <li>• n/a</li> </ul> | Selection (3)                                   |  |
|                                     |                                                                        | Comparability (2)                               |  |
|                                     |                                                                        | Outcome (3)                                     |  |
|                                     |                                                                        | Total = 8                                       |  |

Notes. n/a = not available; n = number; mNOS = modified Newcastle-Ottawa Scale
